# Supplementary material for: A low-content CeOx dually promoted Ni3Fe@CNT electrocatalyst for overall water splitting
Source: Royal Society of Chemistry journal article supplement (doi:10.1039/d3dt00709j), 2023-01-01
Supplement: d3dt00709j1.pdf [file d3dt00709j1.pdf]

## Electronic Supplementary Information (ESI)

### Low-content $\text{CeO}_x$ dually promoted $\text{Ni}_3\text{Fe}@$ CNTs electrocatalyst for overall water splitting

Mingqi Sun, Shuai Zhang, Yaru Li, Chen Yang, Ying Guo,\* Lan Yang and Sailong Xu\*

*State Key Laboratory of Chemical Resource Engineering, Beijing University of Chemical Technology, Beijing 100029, China*

\*Corresponding authors. E-mail addresses: xusl@buct.edu.cn (S.X.); guoying@buct.edu.cn (Y.G.)

Fig. S1

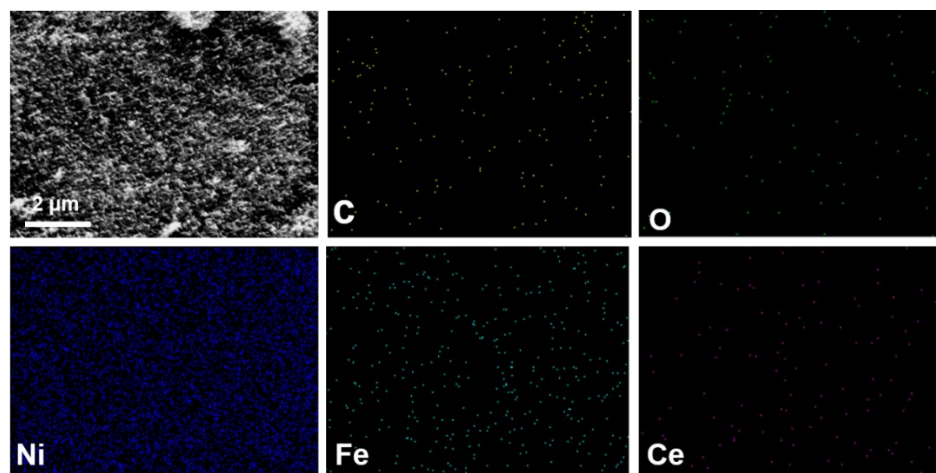

**Fig. S1** SEM image of the  $\text{Ni}_3\text{Fe}@$ CNTs/ $\text{CeO}_x$ /NF composites and the corresponding EDS elements mappings of C, O, Ni, Fe and Ce elements.

Fig. S2

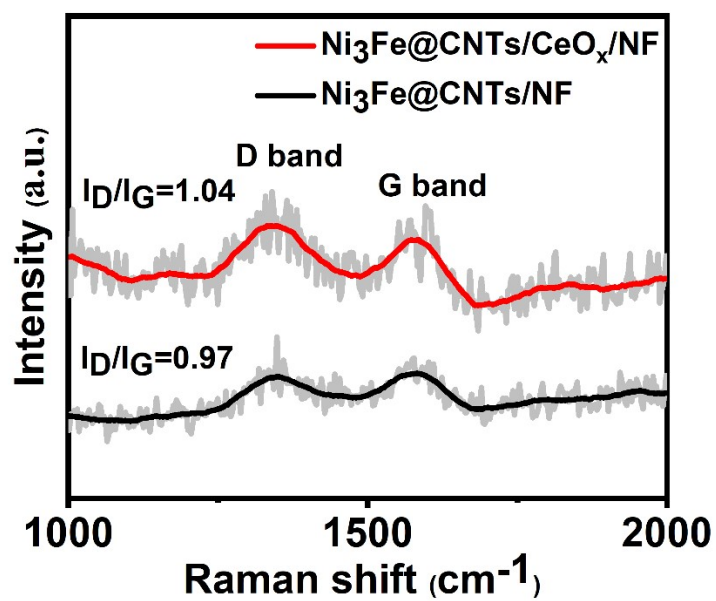

Fig. S2 Raman spectra of Ni<sub>3</sub>Fe@CNTs/CeO<sub>x</sub>/NF and Ni<sub>3</sub>Fe@CNTs/NF.

Fig. S3

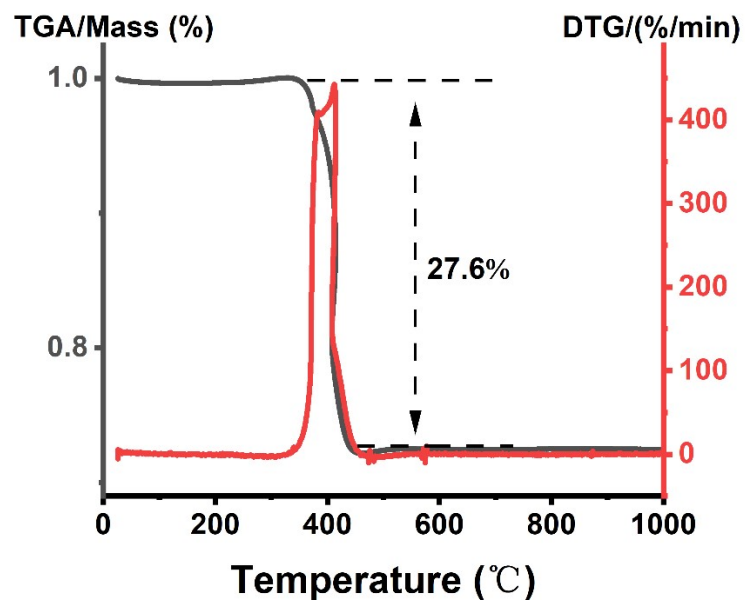

**Fig. S3** Thermogravimetric analysis and derivative thermogravimetry (TGA/DTG) of the Ni<sub>3</sub>Fe@CNTs/CeO<sub>x</sub>/NF composite.

**Fig. S4**

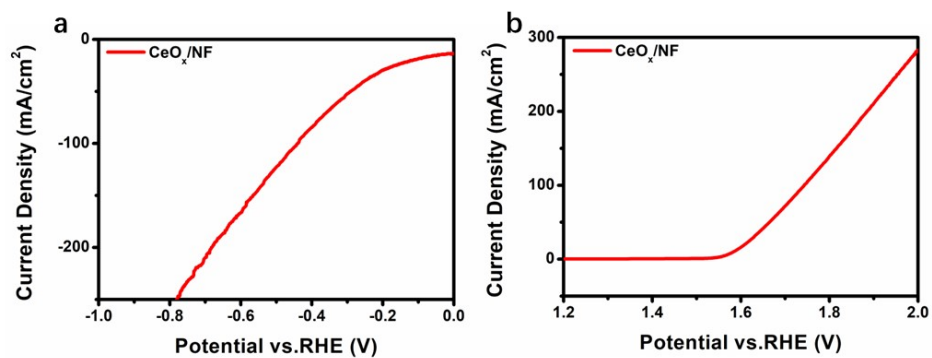

**Fig. S4** LSV curve for  $\text{CeO}_x/\text{NF}$ : (a) The HER performance (b) The OER performance

**Fig. S5**

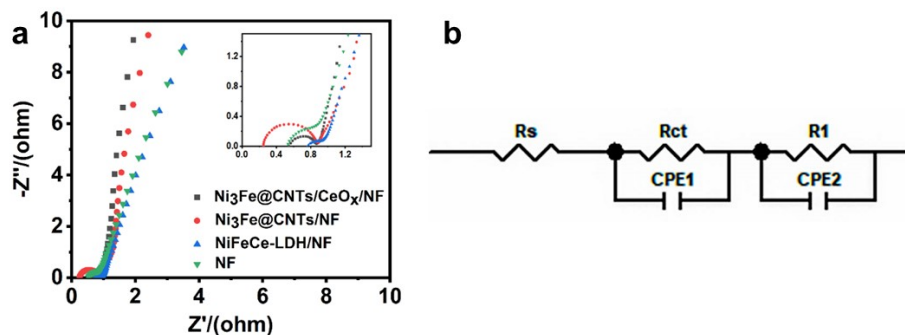

**Fig. S5** (a) Electrochemical impedance spectra for the OER between  $Ni_3Fe@CNTs/CeO_x/NF$ ,  $Ni_3Fe@CNTs/NF$ , together with  $NiFeCe-LDH/NF$  and  $NF$  for comparison; (b) the equivalent circuit diagram of  $Ni_3Fe@CNTs/CeO_x/NF$ .

Fig. S6

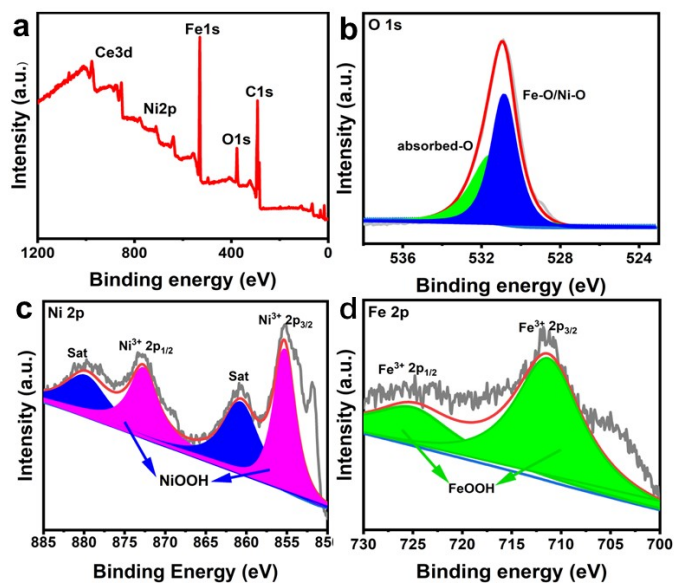

**Fig. S6** XPS spectra of the  $\text{Ni}_3\text{Fe@CNTs/CeO}_x/\text{NF}$  composite after the OER testing:

(a) a full spectrum, (b) O 1s, (c) Ni 2p, and (d) Fe 2p.

**Fig. S7**

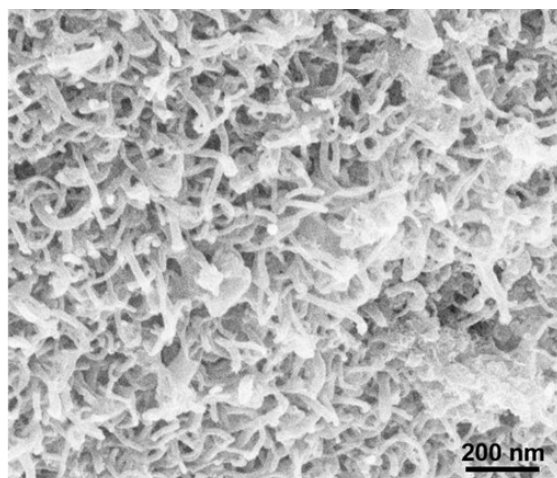

**Fig. S7** SEM of Ni<sub>3</sub>Fe@CNTs/CeO<sub>x</sub>/NF after OER test.

Fig. S8

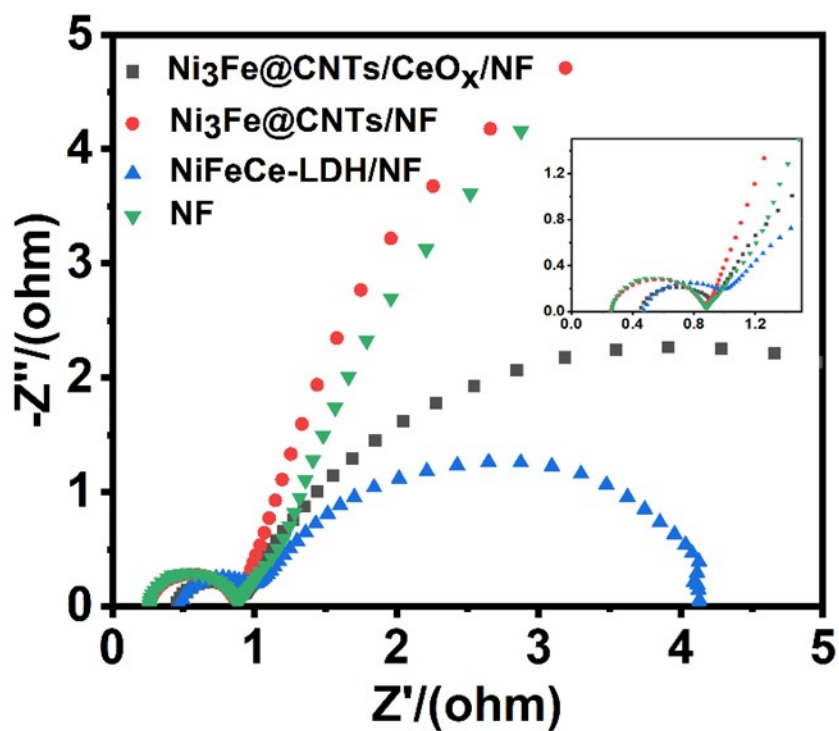

**Fig. S8** Electrochemical impedance spectra of  $\text{Ni}_3\text{Fe@CNTs/CeO}_x/\text{NF}$  and  $\text{Ni}_3\text{Fe@CNTs/NF}$  for the HER, together with  $\text{NiFeCe-LDH/NF}$  and  $\text{NF}$  for comparison.



Fig. S9

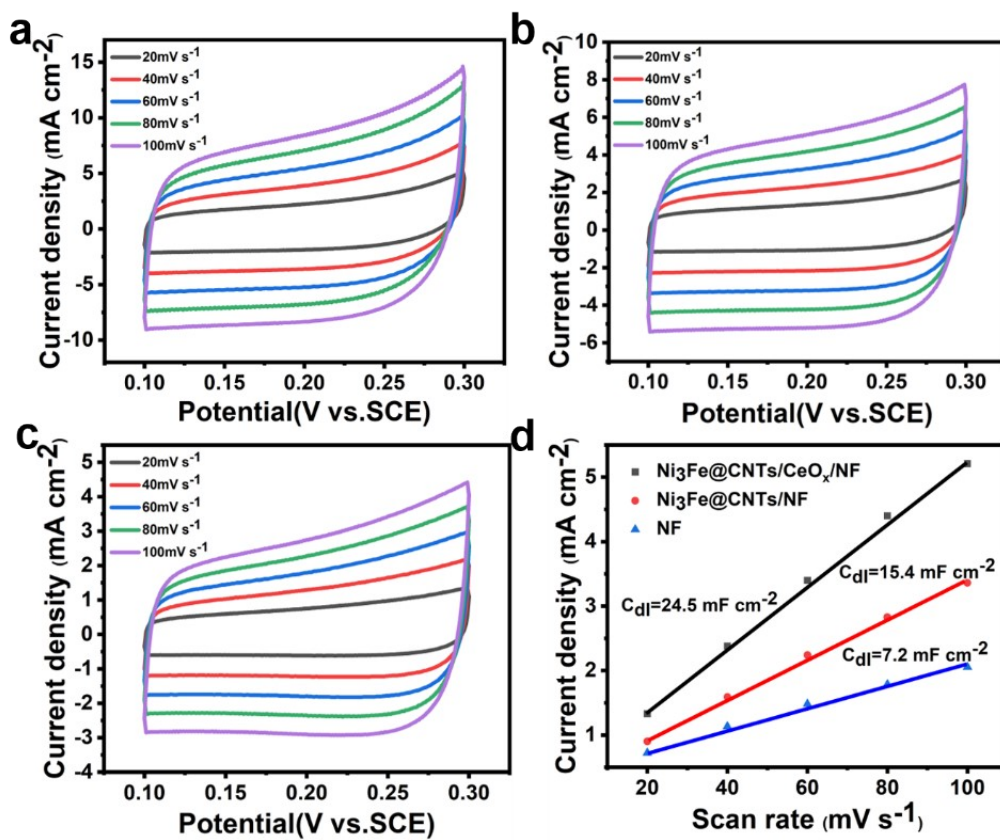

**Fig.S9** Cyclic voltammograms (CVs) for (a) Ni<sub>3</sub>Fe@CNTs/CeO<sub>x</sub>/NF, (b) Ni<sub>3</sub>Fe@CNTs/NF, (c) NF measured at sweep speeds from 20 to 100 mV s<sup>-1</sup> and (d) the current densities at 0.15 V vs. SCE plotted as a function of scan rates.

Fig. S10

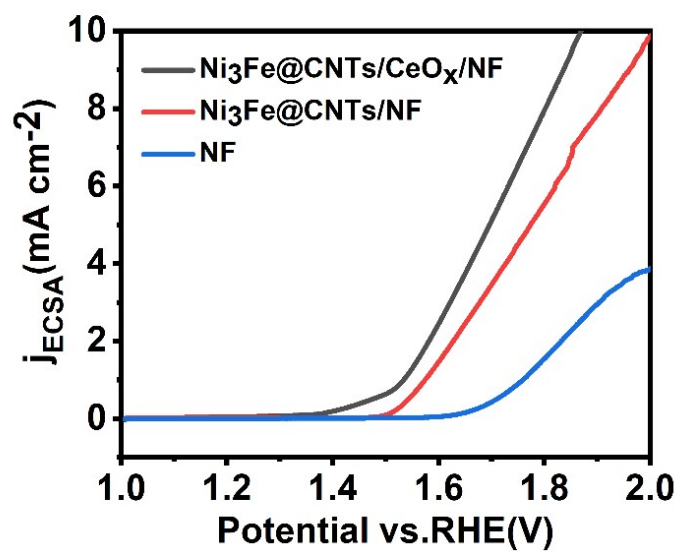

**Fig. S10** The OER LSV curves normalized by ECSA for Ni<sub>3</sub>Fe@CNTs/CeO<sub>x</sub>/NF, Ni<sub>3</sub>Fe-CNTs/NF, and NF.

**Table S1**

The ICP-OES result of Ni, Fe and Ce in the Ni<sub>3</sub>Fe/CeO<sub>x</sub>-CNTs.

| Element | Mass fraction (wt.%) | Mole fraction |
|---------|----------------------|---------------|
| Ni      | 19.29                | 3.28          |
| Fe      | 5.33                 | 0.95          |
| Ce      | 1.34                 | 0.09          |

**Table S2**

Comparison  $R_{ct}$  between  $\text{Ni}_3\text{Fe@CNTs/CeO}_x/\text{NF}$ ,  $\text{Ni}_3\text{Fe@CNTs/NF}$ , and NF for the OER.

| Catalyst          | $\text{Ni}_3\text{Fe@CNTs/CeO}_x/\text{NF}$ | $\text{Ni}_3\text{Fe@CNTs/NF}$ | NF   |
|-------------------|---------------------------------------------|--------------------------------|------|
| $R_{ct} / \Omega$ | 0.27                                        | 0.60                           | 1.73 |

**Table S3**

Comparison of OER performance at 10 mA cm<sup>-2</sup> between the Ni<sub>3</sub>Fe@CNTs/CeO<sub>x</sub> composite and those Ni<sub>3</sub>Fe-based electrocatalysts reported previously (in 1.0 M KOH solution).

| Catalysts                                | Overpotential (mV) | Long-term stability (h) | References                                        |
|------------------------------------------|--------------------|-------------------------|---------------------------------------------------|
| Ni <sub>3</sub> Fe-NC/NF                 | 203                | 110                     | <i>J. Mater. Chem. A</i> , 2023, 11, 6452         |
| Fe <sub>4</sub> Ni-Se/NF                 | 207                | 70                      | <i>J. Electroanal. Chem.</i> , 2022, 906, 116014  |
| Hollow FeNi <sub>3</sub> N               | 210                | 30                      | <i>J. Mater. Chem. A</i> , 2021, 9, 7750          |
| Fe <sub>0.2</sub> Ni <sub>0.8</sub> /NC  | 270                | 12                      | <i>Chem. Eng. J.</i> , 2020, 394, 124977          |
| Fe-enriched-FeNi <sub>3</sub> /NC        | 300                | 3000 cycles             | <i>J. Colloid Interface Sci.</i> , 2021, 582, 977 |
| Ni <sub>3</sub> Fe@B-doped carbon        | 280                | 20                      | <i>J. Alloys Compd.</i> , 2020, 835, 155267       |
| Ni <sub>3</sub> FeN/Ni <sub>3</sub> Fe   | 250                | 2000 cycles             | <i>J. Mater. Chem. A</i> , 2021, 9, 4036          |
| Ni <sub>3</sub> Fe/N-C                   | 330                | 10                      | <i>Carbon</i> , 2021, 174, 475                    |
| FeNi <sub>3</sub> @NC                    | 277                | 20                      | <i>Appl. Catal. B</i> , 2020, 268, 118729         |
| Ni <sub>3</sub> Fe-CW                    | 237                | 50                      | <i>Chem. Eng. J.</i> , 2022, 439, 135722          |
| Ni <sub>3</sub> Fe@CNTs/CeO <sub>x</sub> | 195                | 100                     | <b>This work</b>                                  |

x

**Table S4**

Comparison of HER performance at 10 mA cm<sup>-2</sup> between the Ni<sub>3</sub>Fe@CNTs/CeO<sub>x</sub> composite and those Ni<sub>3</sub>Fe-based electrocatalysts reported previously (in 1.0 M KOH solution).

| Catalysts                                                   | Overpotential (mV) | Long-term stability (h) | References                                             |
|-------------------------------------------------------------|--------------------|-------------------------|--------------------------------------------------------|
| Fe <sub>4</sub> Ni-Se/NF                                    | 93                 | 70                      | <i>J. Electroanal. Chem.</i> , 2022, 906, 116014       |
| (Ni, Fe)S <sub>2</sub> @MoS <sub>2</sub>                    | 130                | 44                      | <i>Appl. Catal. B Environ.</i> , 2019, 247, 107        |
| Hollow FeNi <sub>3</sub> N                                  | 185                | 30                      | <i>J. Mater. Chem. A</i> , 2021, 9, 7750               |
| Ni <sub>3</sub> Fe/NiFe <sub>2</sub> O <sub>4</sub> NPs@CNT | 128                | 40                      | <i>ACS Appl. Mater. Interfaces</i> 2020, 12, 50, 55782 |
| Fe-Ni@NC-CNTs                                               | 202                | 11                      | <i>Angew. Chem. Int. Ed.</i> , 2018, 57, 8921          |
| Ni <sub>3</sub> Fe@BC                                       | 330                | 20                      | <i>J. Alloys Compd.</i> , 2020, 835, 155267            |
| Ni <sub>3</sub> FeN/Ni <sub>3</sub> Fe                      | 125                | 2000 cycles             | <i>J. Mater. Chem. A</i> , 2021, 9, 4036               |
| Ni <sub>3</sub> Fe(OH) <sub>9</sub> /Ni <sub>3</sub> Fe     | 217                | 12                      | <i>ACS Appl. Energy Mater.</i> 2018, 1, 3, 986-992     |
| Ni <sub>3</sub> Fe-CW                                       | 76                 | 50                      | <i>Chem. Eng. J.</i> , 2022, 439, 135722               |
| Ni <sub>3</sub> Fe-NC/NF                                    | 98                 | 110                     | <i>J. Mater. Chem. A</i> , 2023, 11, 6452              |
| Ni <sub>3</sub> Fe@CNTs/CeO <sub>x</sub>                    | 125                | 100                     | <b>This work</b>                                       |

**Table S5**

Comparison of electrocatalytic performance as the electrolyzer at 10 mA cm<sup>-2</sup> between the Ni<sub>3</sub>Fe@CNTs/CeO<sub>x</sub> composite and those Ni<sub>3</sub>Fe-based electrocatalysts reported previously (in 1.0 M KOH solution).

| Catalysts                                                   | Overall voltage (V) | References                                             |
|-------------------------------------------------------------|---------------------|--------------------------------------------------------|
| Ni <sub>3</sub> Fe-NC/NF                                    | 1.49                | <i>J. Mater. Chem. A</i> , 2023, 11, 6452              |
| S-Fe-Ni/NF                                                  | 1.49                | <i>J. Mater. Chem. A</i> , 2023, 11, 4661–4671         |
| Fe <sub>4</sub> Ni-Se/NF                                    | 1.55                | <i>J. Electroanal. Chem.</i> , 2022, 906, 116014       |
| Hollow FeNi <sub>3</sub> N                                  | 1.63                | <i>J. Mater. Chem. A</i> , 2021, 9, 7750               |
| Ni <sub>3</sub> Fe/NiFe <sub>2</sub> O <sub>4</sub> NPs@CNT | 1.62                | <i>ACS Appl. Mater. Interfaces</i> 2020, 12, 50, 55782 |
| Ni <sub>3</sub> FeN/Ni <sub>3</sub> Fe                      | 1.61                | <i>J. Mater. Chem. A</i> , 2021, 9, 4036               |
| Fe-enriched-FeNi <sub>3</sub> /NC                           | 1.59                | <i>J. Colloid Interface Sci.</i> , 2021, 582, 977      |
| Ni <sub>3</sub> Fe-CW                                       | 1.54                | <i>Chem. Eng. J.</i> , 2022, 439, 135722               |
| Ni <sub>3</sub> Fe-FeV <sub>2</sub> O <sub>4</sub> @C/NF    | 1.51                | <i>ACS Sustainable Chem. Eng.</i> 2021, 9, 24, 8249    |
| Ni <sub>3</sub> Fe/Co-N-C                                   | 1.54                | <i>Chem. Eng. J.</i> , 2020, 395, 125151               |
| Ni <sub>3</sub> Fe@CNTs/CeO <sub>x</sub>                    | 1.641               | <b>This work</b>                                       |

**Table S6**

Comparison of exchange current densities for the OER between Ni<sub>3</sub>Fe@CNTs/CeO<sub>x</sub>/NF, Ni<sub>3</sub>Fe@CNTs/NF, NF and IrO<sub>2</sub>.

| Catalyst                                         | Ni <sub>3</sub> Fe@CNTs/CeO <sub>x</sub> /NF | Ni <sub>3</sub> Fe@CNTs/NF | NF                    | IrO <sub>2</sub>      |
|--------------------------------------------------|----------------------------------------------|----------------------------|-----------------------|-----------------------|
| Exchange current densities (mA/cm <sup>2</sup> ) | 5.16×10 <sup>-3</sup>                        | 1.83×10 <sup>-3</sup>      | 2.85×10 <sup>-4</sup> | 1.38×10 <sup>-4</sup> |



**Table S7**

Comparison of exchange current densities for the HER between Ni<sub>3</sub>Fe@CNTs/CeO<sub>x</sub>/NF, Ni<sub>3</sub>Fe@CNTs/NF, NF, and Pt.

| Catalyst                                         | Ni <sub>3</sub> Fe@CNTs/CeO <sub>x</sub> /NF | Ni <sub>3</sub> Fe@CNTs/NF | NF                   | Pt                    |
|--------------------------------------------------|----------------------------------------------|----------------------------|----------------------|-----------------------|
| Exchange current densities (mA/cm <sup>2</sup> ) | 3.65×10 <sup>-7</sup>                        | 1.79×10 <sup>-7</sup>      | 6.7×10 <sup>-7</sup> | 1.95×10 <sup>-3</sup> |
